# Supplementary material
Source: publisher figshare collection journal article supplement (https://future-science-group.figshare.com/ndownloader/files/31811405)
Supplement: Supplementary file 1 [file 31811405]

Supplementary Table 1 Primers for RT-qPCR

| Species | Gene | Sequence (5’→3’) |
| --- | --- | --- |
| Human | OAS2 | Former: AGGTGGCTCCTATGGACGG |
|  |  | Reverse: TTTATCGAGGATGTCACGTTGG |
| Human | RSAD2 | Former: TTGGACATTCTCGCTATCTCCT |
|  |  | Reverse: AGTGCTTTGATCTGTTCCGTC |
| Human | PLSCR1 | Former: GGCATTTACAGACGCTGATAACT |
|  |  | Reverse: AGGCACCAATCATTACAGCTTT |
| Human | IFIT1 | Former: GCGCTGGGTATGCGATCTC |
|  |  | Reverse: CAGCCTGCCTTAGGGGAAG |
| Human | IFIT3 | Former: AGAAAAGGTGACCTAGACAAAGC |
|  |  | Reverse: CCTTGTAGCAGCACCCAATCT |
